# Supplementary material
Source: publisher figshare collection journal article supplement (https://gsapubs.figshare.com/ndownloader/files/22759169)
Supplement: Supplementary file 1 [file 22759169]

## GSA DATA REPOSITORY 2009203

### Terrestrial climate signal of the "8200-yr cold event" in the Labrador Sea region

Timothy J. Daley\*, F. Alayne Street-Perrott, Neil J. Loader, Keith E. Barber, Paul D.M. Hughes, Elizabeth H. Fisher & James D. Marshall

\* t.j.daley@swansea.ac.uk

---

### Methods and chronology

**Core stratigraphy.** A 9m-long peat core (NDN02/1) was collected from Nordans Pond Bog in 2002 using a large-bore Russian corer. Sub-samples were taken at 8-cm intervals to permit centennial-scale resolution throughout the Holocene. Additional sampling was conducted at intervals of 4cm from 8400 to 8000 yr BP, and 1cm across the primary isotopic event, to provide sub-centennial and decadal resolution, respectively. In contrast to  $\delta^{18}\text{O}$  analyses of bulk peat by earlier workers, *Sphagnum* leaves were isolated from each sub-sample using a stacked sieve system and density-separation procedure (Daley, 2007). The grain-size fraction containing the highest abundance of *Sphagnum* remains was subjected to density separation by hand swirling in a petri dish to separate non-*Sphagnum* elements, which were removed by pipette. The effectiveness of this procedure was verified by microscopic examination. Alpha-cellulose was prepared from the *Sphagnum* concentrates for isotopic analysis (Loader et al., 1997). Absence of *Sphagnum* remains precluded measurement of  $\delta^{18}\text{O}$  on some sampled levels but only led to short gaps in the  $\delta^{18}\text{O}_{\text{Sphagnum}}$  time series (see Table DR1).

**Isotopic analysis.** Water samples ( $n = 8$ ) were collected from the bog surface in July 2004 and analysed using a standard Zn-reduction method for  $\delta\text{D}$  and standard equilibration for  $\delta^{18}\text{O}$ . Stable-isotope ratios were measured on an automated VG Isogas Sira 12 triple-collecting mass spectrometer and the results expressed using conventional  $\delta$  notation in per mille (‰) relative to VSMOW (Vienna Standard Mean Ocean Water).  $\delta\text{D}$  data were

normalised to the SMOW-SLAP scale using IAEA standards OH-1, OH-3 and OH-4. Alpha-cellulose samples were pyrolysed over glassy carbon at 1090°C using an ANCA-GSL elemental analyser interfaced with a PDZ Europa 20-20 isotope-ratio mass spectrometer and the results expressed in  $\delta$  notation (‰) relative to VSMOW. The precision of replicate alpha-cellulose extractions from a single core level was  $\pm 0.32\text{‰}$  ( $1\sigma$ ,  $n = 10$ ).

**Palaeoclimatic reconstruction.**  $\delta^{18}\text{O}_{\text{precipitation}}$  was estimated from  $\delta^{18}\text{O}_{\text{Sphagnum}}$  using the measured cellulose-water enrichment factor  $\alpha = 1.0274 \pm 0.0010$  ( $1\sigma$ ) (Daley, 2007). The slope of the modern  $\Delta T - \Delta\delta^{18}\text{O}_{\text{precipitation}}$  relationship was derived by linear regression from the GNIP datasets for Goose Bay, Labrador ( $R^2 = 0.60$ ,  $p < 0.0001$ ,  $n = 57$ ) and Truro, Nova Scotia ( $R^2 = 0.62$ ,  $p < 0.0001$ ,  $n = 75$ ). Both GNIP datasets pass normality-assumption testing by the Kolmogorov-Smirnov technique. The  $1\sigma$  error of the  $\delta^{18}\text{O}_{\text{precipitation}}$  estimates is given by  $\pm \sqrt{[(0.32)^2 + (1.0)^2]}$ .

**Radiocarbon chronology.** 23 levels were selected from core NDN02/1 for AMS  $^{14}\text{C}$  dating (Fig. DR1 and Table DR2). Dated material picked from peat sub-samples comprised aerial parts of *in situ* plant remains only. The calibrated age of each sample was taken to be the mid-point of the most probable age range given by CALIB 5.0.2 (Stuiver and Reimer, 1993). Dating uncertainty (Fig. 4) was given by the  $2\sigma$  range from CALIB 5.0.2. Three dates exhibit temporal reversals at 450 cm, 652 cm and 616 cm. Whilst every effort to sample above ground *in situ* remains was made, it is possible that young root material, difficult to identify by microscopy, was present in these individual samples. Two options exist for modelling a sequence in which temporal reversals are present. Either a choice needs to be taken to omit one of the two dates that comprise a reversal or a global model needs to be fitted that treats each date as equally probable and avoids the inherent subjectivity of selecting one for

omission. The second, more objective option has been used here. The age-depth model for the core was constructed by cubic regression (equation 1) ( $R^2 = 0.9964$ ):

$$\text{Age (yr BP)} = -156.6 + 4.46 (\text{depth}) + 0.0361 (\text{depth})^2 - 0.000035 (\text{depth})^3 \quad (1),$$

where depth is measured in cm down-core.

**Figure DR1.** Calibrated  $^{14}\text{C}$  dates for NDN02/1 (circles) with calibration ranges from  $2\sigma$  errors on conventional radiocarbon ages (bars). Cubic regression age-depth model ( $y = -156.6 + 4.46x + 0.03617x^2 - 0.000035x^3$ ) shown by bold black line.

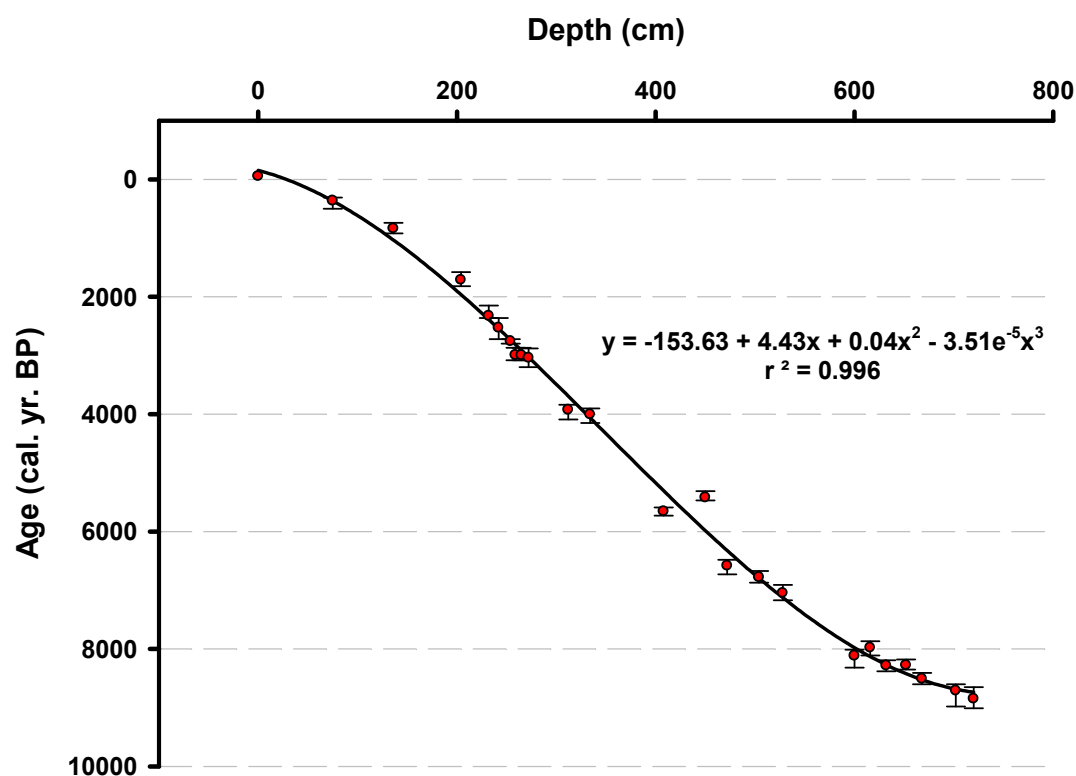

**Table DR1. NDN02/1 Core stratigraphical data.**

Measured  $\delta^{18}\text{O}_{\text{Sphagnum}}$  data used to generate  $\delta^{18}\text{O}_{\text{precipitation}}$  estimates with their corresponding depths and interpolated ages (Table DR2).  $\delta^{18}\text{O}_{\text{precipitation}}$  values were derived using the measured  $\alpha_{\text{cellulose-precipitation}}$  enrichment factor of  $1.0274 \pm 0.0010$  ( $1\sigma$ ) (Daley, 2007).

---

**NDN02/1 core stratigraphic data**


---

| Depth below<br>surface (cm) | Age (cal. yr.<br>BP) | $\delta^{18}\text{O}_{\text{Sphagnum}}$<br>(‰) | $\delta^{18}\text{O}_{\text{Precipitation}}$<br>(‰) |
|-----------------------------|----------------------|------------------------------------------------|-----------------------------------------------------|
| 0                           | -157                 | 19.70                                          | -7.50                                               |
| 8                           | -119                 | 20.19                                          | -7.02                                               |
| 16                          | -76                  | 20.42                                          | -6.79                                               |
| 24                          | -29                  | 19.97                                          | -7.23                                               |
| 32                          | 22                   | 19.67                                          | -7.53                                               |
| 40                          | 77                   | 20.40                                          | -6.82                                               |
| 48                          | 137                  | 20.29                                          | -6.92                                               |
| 56                          | 200                  | 19.91                                          | -7.29                                               |
| 64                          | 268                  | 20.89                                          | -6.34                                               |
| 72                          | 339                  | 21.02                                          | -6.21                                               |
| 80                          | 414                  | 20.31                                          | -6.90                                               |
| 88                          | 492                  | 20.19                                          | -7.02                                               |
| 96                          | 574                  | 19.74                                          | -7.46                                               |
| 104                         | 659                  | 19.67                                          | -7.52                                               |
| 112                         | 747                  | 19.89                                          | -7.31                                               |
| 120                         | 839                  | 20.06                                          | -7.14                                               |
| 128                         | 933                  | 20.47                                          | -6.75                                               |
| 136                         | 1031                 | 20.24                                          | -6.97                                               |
| 144                         | 1131                 | 19.53                                          | -7.66                                               |
| 152                         | 1234                 | 19.69                                          | -7.51                                               |
| 160                         | 1340                 | 19.56                                          | -7.64                                               |
| 168                         | 1448                 | 19.97                                          | -7.24                                               |
| 176                         | 1558                 | 20.51                                          | -6.71                                               |
| 184                         | 1671                 | 19.32                                          | -7.87                                               |
| 192                         | 1785                 | 19.72                                          | -7.48                                               |
| 200                         | 1902                 | 20.54                                          | -6.68                                               |
| 208                         | 2021                 | 20.56                                          | -6.66                                               |
| 216                         | 2142                 | 20.46                                          | -6.76                                               |
| 220                         | 2203                 | 20.44                                          | -6.77                                               |
| 224                         | 2264                 | 21.61                                          | -5.64                                               |
| 232                         | 2388                 | 20.60                                          | -6.62                                               |
| 240                         | 2513                 | 20.60                                          | -6.62                                               |
| 248                         | 2640                 | 20.41                                          | -6.81                                               |
| 256                         | 2768                 | 20.05                                          | -7.16                                               |
| 264                         | 2898                 | 19.87                                          | -7.33                                               |
| 272                         | 3028                 | 19.72                                          | -7.48                                               |
| 276                         | 3094                 | 19.20                                          | -7.99                                               |
| 280                         | 3160                 | 20.98                                          | -6.25                                               |
| 284                         | 3226                 | 20.08                                          | -7.13                                               |

|     |      |       |       |
|-----|------|-------|-------|
| 288 | 3292 | 18.86 | -8.32 |
| 292 | 3358 | 19.17 | -8.01 |
| 296 | 3425 | 18.77 | -8.40 |
| 300 | 3492 | 20.23 | -6.98 |
| 308 | 3626 | 18.96 | -8.22 |
| 312 | 3693 | 20.17 | -7.04 |
| 316 | 3760 | 21.61 | -5.64 |
| 320 | 3828 | 22.43 | -4.84 |
| 324 | 3895 | 20.72 | -6.51 |
| 328 | 3963 | 21.06 | -6.17 |
| 332 | 4030 | 20.51 | -6.71 |
| 336 | 4098 | 22.25 | -5.01 |
| 344 | 4233 | 22.25 | -5.01 |
| 352 | 4368 | 22.33 | -4.93 |
| 384 | 4908 | 21.99 | -5.27 |
| 408 | 5307 | 21.41 | -5.84 |
| 416 | 5439 | 21.32 | -5.92 |
| 424 | 5569 | 21.93 | -5.33 |
| 440 | 5827 | 21.27 | -5.97 |
| 448 | 5954 | 21.50 | -5.74 |
| 456 | 6080 | 21.41 | -5.84 |
| 464 | 6204 | 22.50 | -4.77 |
| 472 | 6326 | 22.46 | -4.81 |
| 480 | 6447 | 22.05 | -5.21 |
| 488 | 6566 | 22.75 | -4.53 |
| 496 | 6683 | 23.17 | -4.12 |
| 504 | 6798 | 21.79 | -5.47 |
| 512 | 6911 | 21.77 | -5.48 |
| 520 | 7022 | 21.55 | -5.70 |
| 528 | 7130 | 21.30 | -5.94 |
| 576 | 7724 | 20.14 | -7.07 |
| 600 | 7981 | 19.57 | -7.62 |
| 604 | 8020 | 19.34 | -7.85 |
| 608 | 8059 | 20.23 | -6.98 |
| 612 | 8097 | 19.66 | -7.53 |
| 616 | 8135 | 18.76 | -8.41 |
| 620 | 8171 | 18.57 | -8.60 |
| 624 | 8206 | 19.42 | -7.77 |
| 628 | 8241 | 20.46 | -6.75 |
| 632 | 8274 | 19.58 | -7.61 |
| 636 | 8306 | 20.06 | -7.15 |
| 637 | 8314 | 19.85 | -7.35 |
| 638 | 8322 | 18.97 | -8.21 |
| 639 | 8330 | 18.36 | -8.80 |
| 640 | 8338 | 17.92 | -9.23 |
| 641 | 8346 | 17.67 | -9.47 |
| 642 | 8353 | 17.78 | -9.37 |
| 643 | 8361 | 17.46 | -9.67 |
| 644 | 8368 | 17.47 | -9.67 |
| 645 | 8376 | 17.59 | -9.55 |
| 646 | 8383 | 17.87 | -9.28 |
| 647 | 8391 | 17.72 | -9.43 |
| 648 | 8398 | 18.61 | -8.56 |
| 649 | 8405 | 18.09 | -9.06 |

|     |      |       |       |
|-----|------|-------|-------|
| 656 | 8454 | 21.99 | -5.27 |
| 702 | 8691 | 21.62 | -5.63 |
| 706 | 8704 | 22.02 | -5.24 |
| 708 | 8710 | 22.14 | -5.12 |

---

|                       |            |            |
|-----------------------|------------|------------|
| Measurement precision | $\pm 0.32$ | $\pm 1.05$ |
|-----------------------|------------|------------|

---

**Table DR2. Radiocarbon dates from core NDN02/1.**

AMS  $^{14}\text{C}$  age determinations and  $1\sigma$  error ranges for all of the sampled levels.  $2\sigma$  calibrated age ranges for these determinations were obtained from the calibration program CALIB 5.0.2. The calibrated date is taken as the midpoint of the most probable age range.

**Table S2 Radiocarbon dates from Core NDN02/1**

| Lab. Code     | Material                          | Depth below bog surface (cm) | $^{14}\text{C}$ date (yr BP uncal.) | $\pm 1\sigma$ | Calibrated age (yr BP) | $2\sigma$ calibrated range |
|---------------|-----------------------------------|------------------------------|-------------------------------------|---------------|------------------------|----------------------------|
| SUERC - 508   | <i>Sphagnum</i>                   | 75                           | 355                                 | 35            | 364                    | 500 – 310                  |
| SUERC-9924    | <i>Sphagnum</i> and dicot remains | 136                          | 912                                 | 35            | 838                    | 920 – 740                  |
| Beta -182370  | <i>Sphagnum</i>                   | 204                          | 1790                                | 40            | 1714                   | 1820 – 1580                |
| SUERC-9923    | <i>Sphagnum</i> and dicot remains | 232                          | 2279                                | 35            | 2326                   | 2360 – 2150                |
| GrA - 31483   | <i>Sphagnum</i>                   | 242                          | 2470                                | 30            | 2528                   | 2720 – 2360                |
| GrA - 31485   | <i>Sphagnum</i>                   | 254                          | 2635                                | 30            | 2758                   | 2800 – 2720                |
| GrA - 31487   | <i>Sphagnum</i>                   | 259                          | 2855                                | 30            | 2994                   | 3080 – 2870                |
| GrA - 31488   | <i>Sphagnum</i>                   | 265                          | 2865                                | 30            | 2998                   | 3080 – 2870                |
| Beta - 182371 | <i>Sphagnum</i>                   | 272                          | 2890                                | 40            | 3042                   | 3200 – 2880                |
| SUERC-9922    | <i>Sphagnum</i> and dicot remains | 312                          | 3632                                | 37            | 3926                   | 4090 – 3840                |
| SUERC - 538   | <i>Sphagnum</i>                   | 334                          | 3691                                | 40            | 4006                   | 4150 – 3900                |
| SUERC-9919    | <i>Sphagnum</i>                   | 408                          | 4922                                | 38            | 5660                   | 5730 – 5590                |
| SUERC - 539   | <i>Sphagnum</i>                   | 450                          | 4640                                | 31            | 5419                   | 5470 – 5310                |
| SUERC-9918    | <i>Sphagnum</i>                   | 472                          | 5796                                | 43            | 6584                   | 6730 – 6480                |
| Beta - 182373 | <i>Sphagnum</i>                   | 504                          | 5950                                | 40            | 6780                   | 6870 – 6670                |
| SUERC-9917    | <i>Sphagnum</i>                   | 528                          | 6144                                | 43            | 7048                   | 7170 – 6910                |
| SUERC-9915    | <i>Sphagnum</i>                   | 600                          | 7330                                | 62            | 8118                   | 8320 – 8010                |
| SUERC - 540   | <i>Sphagnum</i>                   | 616                          | 7156                                | 34            | 7980                   | 8110 – 7870                |
| SUERC-9914    | <i>Sphagnum</i>                   | 632                          | 7475                                | 50            | 8286                   | 8380 – 8190                |
| Beta - 182374 | <i>Sphagnum</i>                   | 652                          | 7460                                | 40            | 8279                   | 8350 – 8180                |
| SUERC-9913    | <i>Sphagnum</i>                   | 668                          | 7740                                | 52            | 8509                   | 8600 – 8410                |
| SUERC-9912    | <i>Carex</i> eutricles and seeds  | 702                          | 7921                                | 52            | 8711                   | 8980 – 8600                |
| Beta - 182375 | <i>Sphagnum</i>                   | 720                          | 7980                                | 40            | 8850                   | 9010 – 8650                |

## References Cited

- Daley, T.J., 2007, Tracking Holocene Climate Change Using Peat Bog Stable Isotopes [Ph.D. thesis]: University of Southampton.
- Loader, N.J., Robertson, I., Barker, A.C., Switsur, V.R., and Waterhouse, J.S., 1997, An improved technique for the batch processing of small wholewood samples to alpha-cellulose: *Chemical Geology*, v. 136, p. 313-317.
- Stuiver, M. and Reimer, P.J., 1993, Extended C-14 data-base and revised Calib 3.0 C-14 age calibration program: *Radiocarbon*, v. 35, p. 215-230.
